# Supplementary material for: Deep oxidative desulfurization catalyzed by an ionic liquid-type peroxotungsten catalyst
Source: Royal Society of Chemistry journal article supplement (doi:10.1039/c5ra00136f), 2015-01-01
Supplement: c5ra00136f1.pdf [file c5ra00136f1.pdf]

## Supporting information

### The Deep Oxidative Desulfurization Catalyzed by Ionic Liquid-type peroxotungsten catalyst

Jizhong Chen, Chen Chen, Ran Zhang, Li Guo, Li Hua, Angjun Chen, Yuhe Xiu, Xuerui Liu,

Zhenshan Hou\*

Key Laboratory for Advanced Materials, Research Institute of Industrial Catalysis, East China  
University of Science and Technology, Shanghai, 200237, China.

E-mail: houzhenshan@ecust.edu.cn

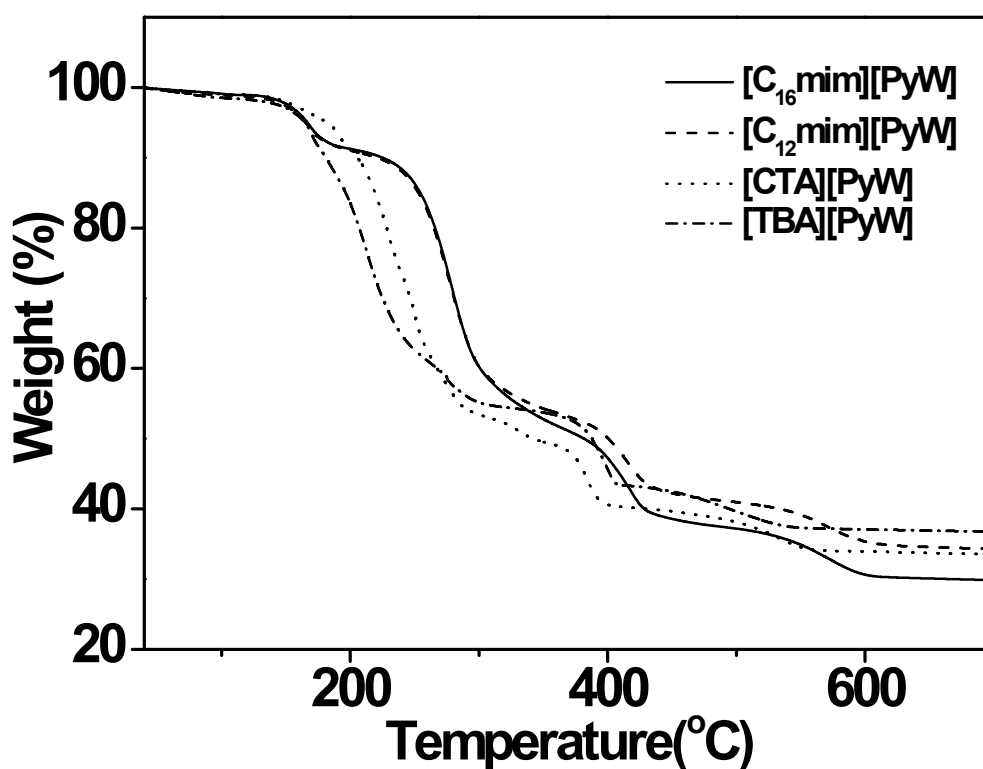

Fig. 1S TGA curves for different catalysts

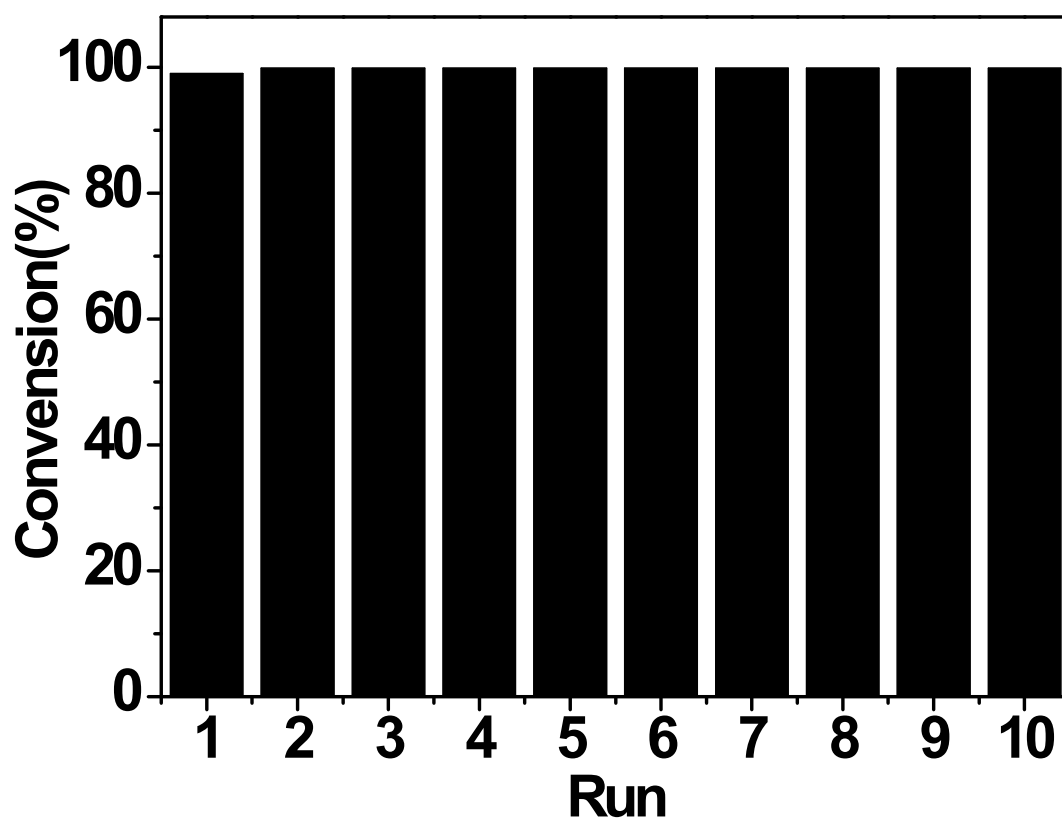

Fig. 2S Recyclability of [C<sub>16</sub>mim][PyW] for desulfurization of DBT. Reaction condition: model oil = 5 mL (S-content 1000 ppm), T = 50 °C, 2 h, n(DBT)/n(Catalyst)/n(H<sub>2</sub>O<sub>2</sub>) = 50:1:200 (molar ratio).

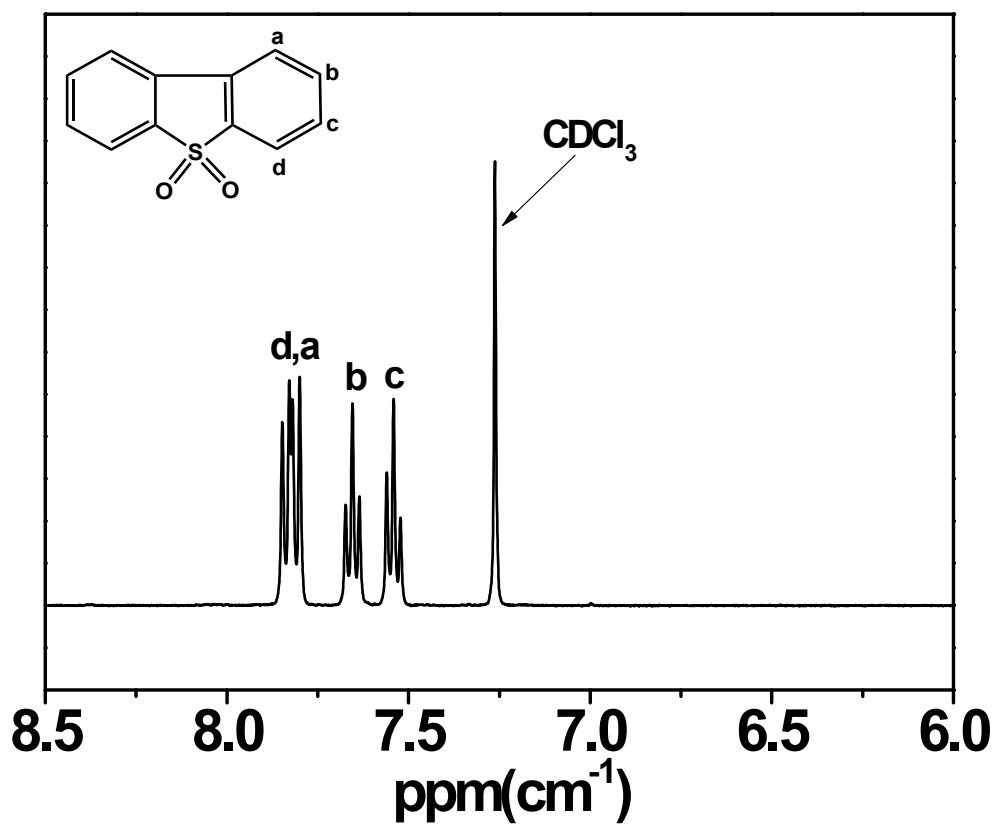

Fig. 3S  $^1\text{H}$  NMR ( $\text{CDCl}_3$ ) signal assignment of the protons of DBTO<sub>2</sub>

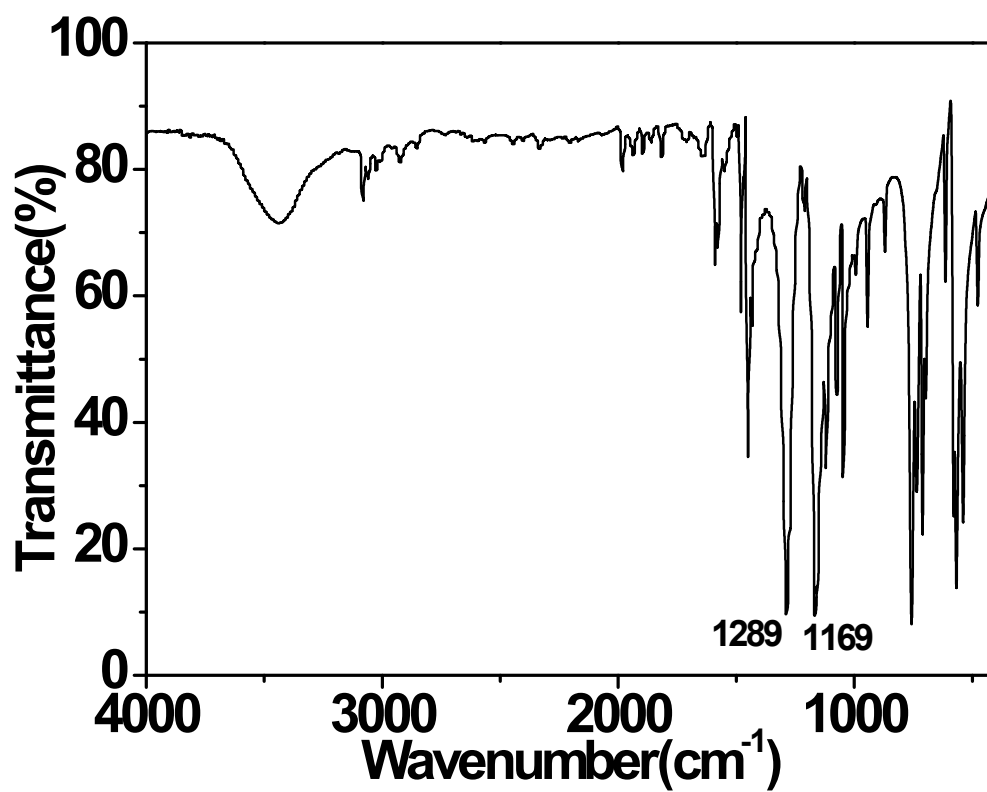

Fig. 4S FT-IR spectra of DBTO<sub>2</sub>
